# Supplementary material for: Influence of the Size and Shape of Halopyridines Guest Molecules G on the Crystal Structure and Conducting Properties of Molecular (Super)Conductors of (BEDT-TTF)4A+[M3+(C2O4)3]·G Family
Source: MDPI journal article supplement (doi:10.3390/magnetochemistry7060083), 2021-06-04
Supplement: s1 [file s1]

# Supplementary Materials: Influence of the Size and Shape of Halopyridines Guest Molecules G on the Crystal Structure and Conducting Properties of Molecular (Super)Conductors of (BEDT-TTF)<sub>4</sub>A<sup>+</sup>[M<sup>3+</sup>(C<sub>2</sub>O<sub>4</sub>)<sub>3</sub>]·G Family

Tatiana G. Prokhorova <sup>1,\*</sup>, Eduard B. Yagubskii <sup>1,\*</sup>, Andrey A. Bardin <sup>2,\*</sup>, Vladimir N. Zverev <sup>3,4</sup>, Gennadiy V. Shilov <sup>1</sup> and Lev I. Buravov <sup>1</sup>

<sup>1</sup> Institute of Problems of Chemical Physics, Russian Academy of Sciences, 142432 Chernogolovka, Russia; shilg@icp.ac.ru (G.V.S.); buravov@icp.ac.ru (L.I.B.)

<sup>2</sup> Institute of Microelectronics Technology and High Purity Materials, Russian Academy of Sciences, 142432 Chernogolovka, Russia

<sup>3</sup> Institute of Solid State Physics, Russian Academy of Sciences, 142432 Chernogolovka, Russia; zverev@issp.ac.ru

<sup>4</sup> Moscow Institute of Physics and Technology, 141700 Dolgoprudny, Russia

\* Correspondence: prokh@icp.ac.ru (T.G.P.); yagubski@icp.ac.ru (E.B.Y.); dr.abardin@gmail.com (A.A.B.)

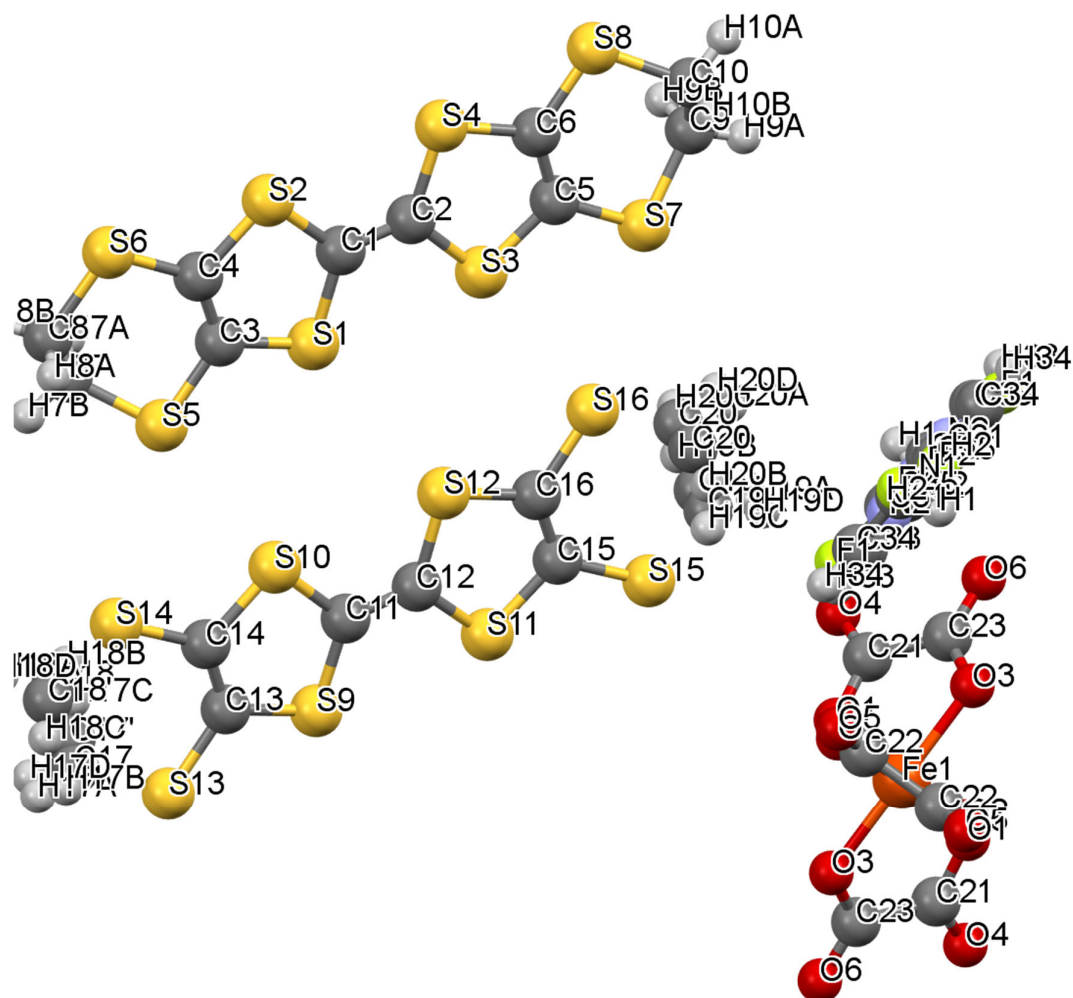

**Figure S1.** Molecular structure of crystals 5,  $\beta''$ -(BEDT-TTF) $_4$ (NH $_4$ )[Fe(C $_2$ O $_4$ ) $_3$ ](2,6-DFPy), with atom numbers.
